# Supplementary material for: Comparison of Coronary Artery Bypass Grafting and Drug-Eluting Stent Implantation in Patients With Chronic Kidney Disease: A Propensity Score Matching Study
Source: Frontiers journal article supplement (doi:10.3389/fcvm.2022.802181), 2022-04-01
Supplement: Table_1.DOCX [file Table_1.DOCX]

**Table 1 Comparison of preoperative baseline characteristics between CABG and PCI groups**

| **Clinical variables** | **Before PS matched** | | **p-value** | **After PS matched** | | **p-value** |
| --- | --- | --- | --- | --- | --- | --- |
| PCI  (n=952) | CABG  (n=533) | PCI  (n=399) | CABG  (n=399) |
| Age (years) | 62.9±12.26 | 64.9±8.84 | <.001 | 64.3±12.9 | 64.4±9.1 | 0.937 |
| Male (%) | 700(73.6) | 446(83.7) | <.001 | 318(79.7) | 325(81.1) | 0.531 |
| BMI (kg/m2) | 26.08±3.38 | 25.84±3.25 | 0.185 | 26.1±3.49 | 25.1±3.28 | 0.887 |
| Family history (%) | 18(1.9) | 19(3.6) | 0.002 | 9(2.3) | 16(4.0) | 0.222 |
| Hypertension (%) | 811(85.2) | 398(74.7) | <.001 | 311(77.9) | 317(79.4) | 0.604 |
| Diabetes (%) | 441(46.3) | 187(35.1) | <.001 | 153(38.3) | 153(38.3) | 1.000 |
| Smoking (%) | 394(41.4) | 222(41.7) | 0.921 | 165(41.1) | 156(39.1) | 0.516 |
| Heart failure (%) | 45(4.7) | 13(2.4) | 0.030 | 17(4.3) | 9(2.3) | 0.162 |
| COPD (%) | 35(3.7) | 13(2.4) | 0.120 | 18(4.5) | 9(2.3) | 0.078 |
| Carotid artery stenosis (%) | 38(4.0)) | 111(20.8) | <.001 | 34(8.5) | 37(9.3) | 0.709 |
| ACS (%) | 330(34.7) | 99(18.6) | <.001 | 92(23.1) | 85(21.3) | 0.551 |
| Angina (%) | 622(65.3) | 432(81.1) | <.001 | 307(76.9) | 314(78.7) | 0.730 |
| Emergency surgery (%) | 29(3.0) | 23(4.3) | 0.202 | 12(3.0) | 15(3.8) | 0.557 |
| Previous MI >3 weeks(%) | 347(36.4) | 164(30.8) | 0.027 | 137(34.3) | 119(29.8) | 0.172 |
| Previous PCI (%) | 219(23.0) | 61(111.4) | <.001 | 54(13.5) | 53(13.3) | 0.917 |
| Previous atrial fibrillation (%) | 58(6.1) | 17(3.2) | 0.014 | 26(6.5) | 10(2.5) | 0.006 |
| Previous TIA or stroke (%) | 143(15.0) | 68(12.9) | 0.231 | 59(14.8) | 43(10.8) | 0.090 |
| Paralysis (%) | 11(1.2) | 11(2.1) | 0.165 | 3(0.8) | 7(1.8) | 0.203 |
| Hemoglobin (g/L) | 119.9±24.6 | 111.0±21.33 | <0.01 | 112.6±21.2 | 110.8±23.3 | 0.056 |
| Serum albumin (mmol/L) | 31.4±7.4 | 41.7 ±8.2 | 0.512 | 41.6±7.3 | 41.7±8.4 | 0.993 |
| Triglyceride (mmol/L) | 3.1±2.5 | 1.8±1.1 | <0.01 | 2.2±1.2 | 2.1±1.8 | 0.742 |
| Cholesterol (mmol/L) | 4.5±1.6 | 4.2±1.0 | <0.01 | 4.5±1.1 | 4.7±1.3 | 0.113 |
| eGFR (ml/min/1.73 m2) | 33.06±16.89 | 34.81±13.45 | 0.030 | 33.88±16.22 | 34.03±13.38 | 0.890 |
| eGFR<30ml/min/1.73 m2 | 565(59.3) | 373(70) | <0.01 | 258(64.7) | 267(66.9) | 0.502 |
| Dialysis (%) | 174(18.3) | 87(16.3) | 0.343 | 69(17.3) | 71(17.8) | 0.852 |
| Left main disease (%) | 93(9.8) | 90(16.9) | <0.01 | 58(14.5) | 55(13.8) | 0.761 |
| No.of narrowed coronary arteries | 2.8±0.79 | 3.1±0.63 | <0.01 | 3.0±0.84 | 3.0±0.63 | 0.962 |
| ≤2(%) | 358(376) | 83(15.9) |  | 113 (28.3) | 71 (17.6) |  |
| 3 (%) | 426(44.7) | 334(62.7) |  | 188 (47.1) | 256 (64.2) |  |
| ≥4 (%) | 168(17.9) | 116(21.8) |  | 98(26.4) | 72(18.0) |  |
| LVEF% | 56.2±11.4 | 56.6±10.8 | 0.576 | 55.2±11.38 | 56.7±11.13 | 0.053 |
| NYHA classification (%) |  |  | <0.01 |  |  | 0.450 |
| 1 | 72(7.6) | 16(3.0) |  | 20(5.0) | 12(3.0) |  |
| 2 | 615(64.6) | 337(63.2) |  | 241(60.40) | 256(64.2) |  |
| 3 | 199(20.9) | 149(28.0) |  | 111(27.8) | 106(26.6) |  |
| 4 | 66(6.9) | 31(5.8) |  | 27(6.8) | 25(6.3) |  |

The data are shown as mean ± SD or n (%); SD: Standard deviation. CABG: Coronary artery bypass grafting; PCI: Percutaneous coronary intervention; eGFR: Estimated glomerular filtration rate; BMI: Body mass index; MI: Myocardial infarction; TIA: Transient ischemic attack; ACS: Acute coronary syndrome; LVEF: Left ventricular ejection fraction; NYHA: New York Heart Association.

**Table 2 Comparison of postoperative data between CABG and PCI groups**

| **Postoperative variables** | **Before PS Matched** | | **p-value** | **After PS Matched** | | **p-value** |
| --- | --- | --- | --- | --- | --- | --- |
| PCI  (n=952) | CABG  (n=533) | PCI (n=399) | CABG  (n=399) |
| ICU time (h) |  | 53.9±11.2 |  |  | 51.9±9.8 |  |
| Mechanic ventilation time(h) |  | 41.5±12.8 |  |  | 39.8±10.7 |  |
| IABP (%) | 28(2.9) | 90(16.9) | < 0.01 | 10(2.5) | 64(16.0) | < 0.01 |
| Red Blood cell transfusion(U) |  | 3.0±1.6 |  |  | 2.7±1.4 |  |
| Reoperation for bleeding (%) |  | 40(7.5%) |  |  | 26(6.5%) |  |
| Re-intubation (%) |  | 13(2.43%) |  |  | 8(2.0%) |  |
| Wound complications (%) |  | 21(3.9%) |  |  | `4(3.5%) |  |
| Myocardial infarction (%) | 29(3.0) | 43(8.1) | < 0.01 | 9(2.3) | 25(6.3) | 0.005 |
| Cerebral infarction (%) | 51(5.4) | 19(3.6) | 0.118 | 20(5.0) | 11(2.8) | 0.099 |
| New-onset dialysis (%) | 46(4.8) | 55(10.3) | < 0.01 | 20(5.0) | 38(9.5) | 0.014 |
| New-onset AF (%) | 53(5.6) | 91(17.1) | < 0.01 | 22(5.5) | 65(16.3) | < 0.01 |
| Cost($) | 8790±4249 | 19796±10369 | < 0.01 | 8963±4369 | 19591±10421 | < 0.01 |
| In‑hospital mortality (%) | 20(2.1%) | 38(7.1%) | < 0.01 | 10(2.5%) | 20(5.0%) | 0.063 |
| Medication at discharge (%) |  |  |  |  |  |  |
| Aspirin | 896 ( 96.3) | 470 ( 95.1) | 0.275 | 378 ( 97.2) | 358 ( 94.7) | 0.083 |
| Clopidogrel/Ticagrelor | 879 ( 94.5) | 458 ( 92.7) | 0.176 | 370 ( 95.1) | 350 ( 92.6) | 0.145 |
| Beta-blockers | 774 ( 83.2) | 434 ( 87.9) | 0.021 | 324 ( 83.3) | 331 ( 87.6) | 0.094 |
| Statins | 804 ( 86.5) | 401 ( 81.2) | 0.009 | 330 ( 84.8) | 309 ( 81.7) | 0.252 |
| Nitrates | 576 ( 61.9) | 447 ( 90.5) | <0.01 | 245 ( 63.0) | 338 ( 89.4) | < 0.01 |

The data are shown as mean ± SD or n (%), SD: Standard deviation; CABG: Coronary artery bypass grafting; PCI: Percutaneous coronary intervention; IABP: Intra‑aortic balloon pump; AF: Atrial fibrillation.

**Table 3 Comparison of follow‑up data between PCI and CABG groups after**

**propensity score matching**

| End-points | CABG (n=399) | PCI (n=399) | p-value | HR (95% CI) |
| --- | --- | --- | --- | --- |
| Survival | | | | |
| 1-year  5-year | 380 (94.2)  333 (68.4) | 391 (98.0)  310 (66.0) | < 0.01  0.602 | 3.72 (1.63,8.49)  0.92 (0.67,1.27) |
| Freedom from myocardial infarction | | | | |
| 1-year  5-year | 394 (99.0)  367 (89.1) | 394 (98.4)  348 (81.7) | 0.992  0.019 | 0.99 (0.29,3.43)  0.59 (0.38,0.92) |
| Freedom from stroke | | | | |
| 1-year | 396 (98.0) | 397 (99.0) | 0.659 | 1.49 (0.25,8.92) |
| 5-year | 367 (86.7) | 363 (91.3) | 0.608 | 1.13 (0.71,1.81) |
| Freedom from repeat revascularization | | | | |
| 1-year | 395 (98.7) | 391 (97.4) | 0.239 | 0.49 (0.15,1.64) |
| 5-year | 363 (86.9) | 338 (73.8) | 0.003 | 0.54 (0.36,0.81) |
| Freedom from MACCEs | | | | |
| 1-year | 379 (92.8) | 387 (95.9) | 0.112 | 1.76 (0.87,3.58) |
| 5-year | 324 (58.5) | 307 (51.3) | 0.030 | 0.71 (0.55,0.91) |

CABG: Coronary artery bypass grafting; PCI: Percutaneous coronary intervention; MACCEs: Main adverse cardiovascular and cerebrovascular events.
